# Supplementary material for: Phenotype-Driven Diagnostic of PTEN Hamartoma Tumor Syndrome: Macrocephaly, But Neither Height nor Weight Development, Is the Important Trait in Children
Source: MDPI journal article supplement (doi:10.3390/cancers11070975), 2019-07-11

Supplementary Material

# Phenotype-Driven Diagnostic of *PTEN* Hamartoma Tumor Syndrome: Macrocephaly, But Neither Height nor Weight Development, is the Important Trait in Children

Michaela Plamper, Bettina Gohlke, Felix Schreiner and Joachim Woelfle

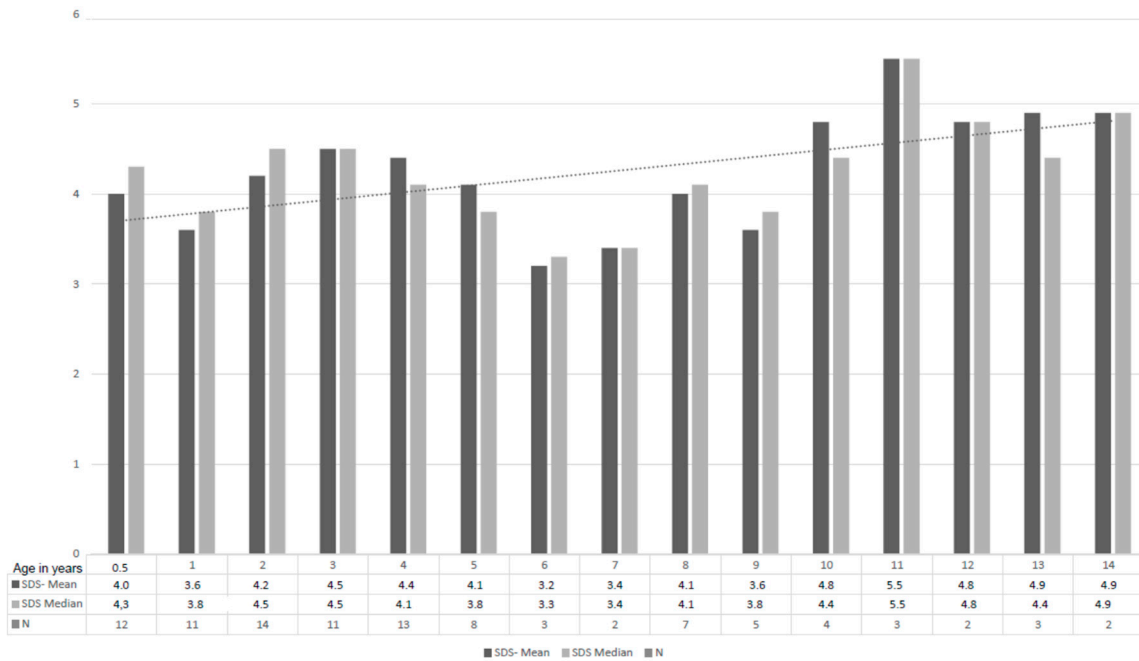

Figure S1. Head circumference in male PHTS patients (SDS; Median and Mean).

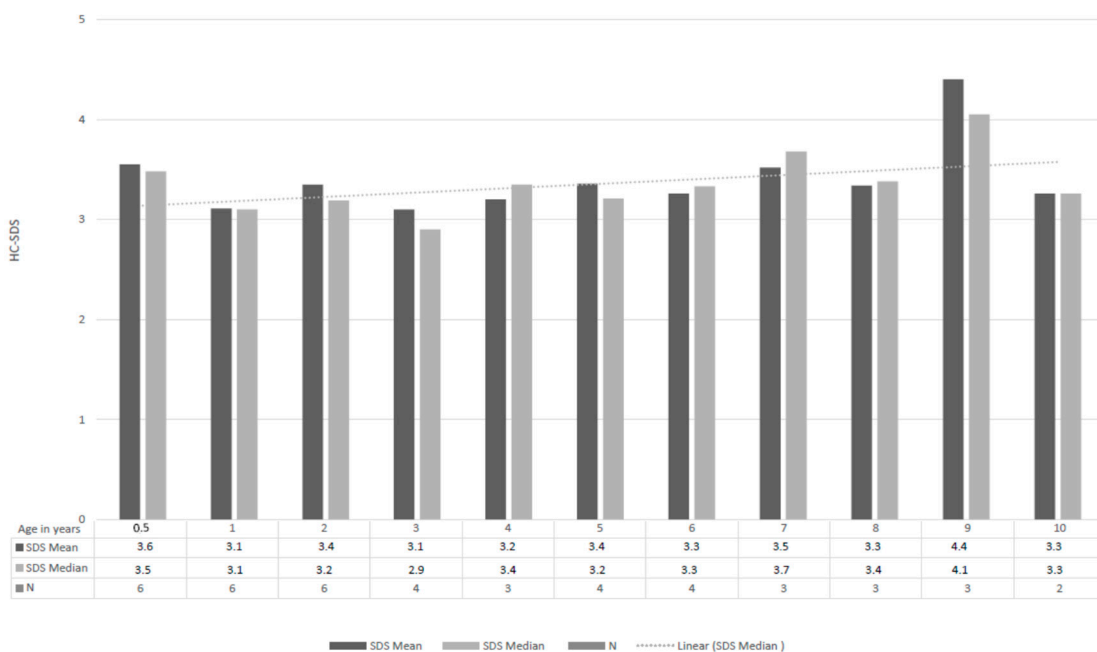

Figure S2. Head circumference in female PHTS patients (SDS, Median and Mean).

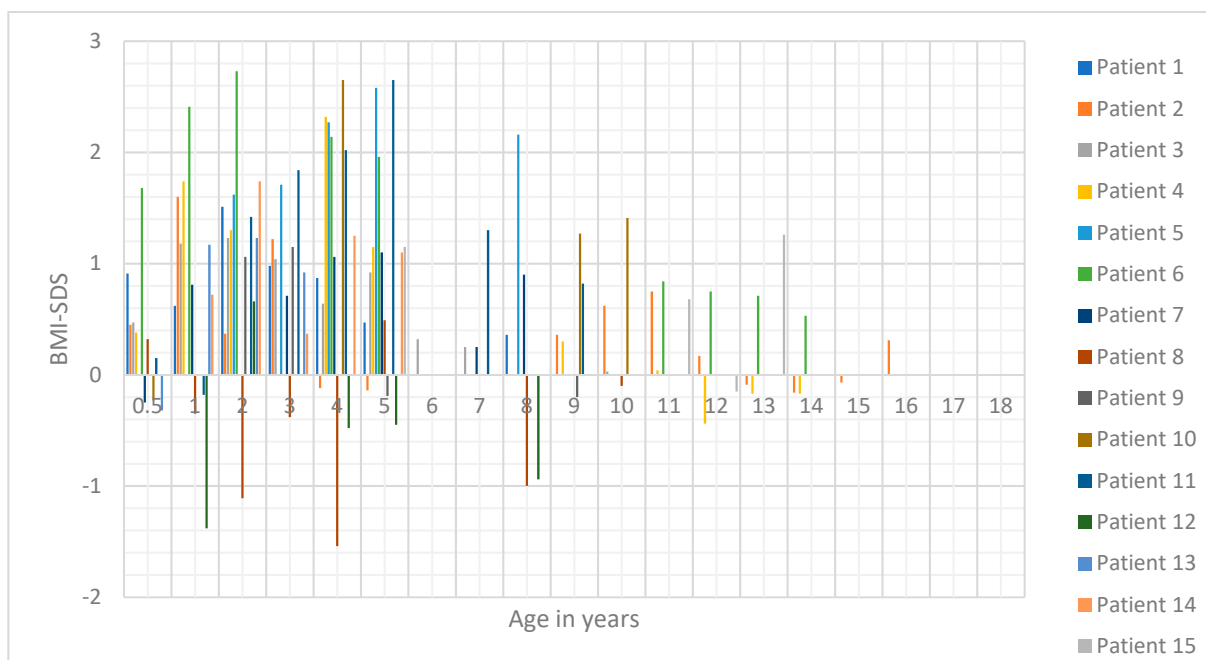

Figure S3. BMI-SDS of male PHTS patients in comparison to German Reference growth charts [11].

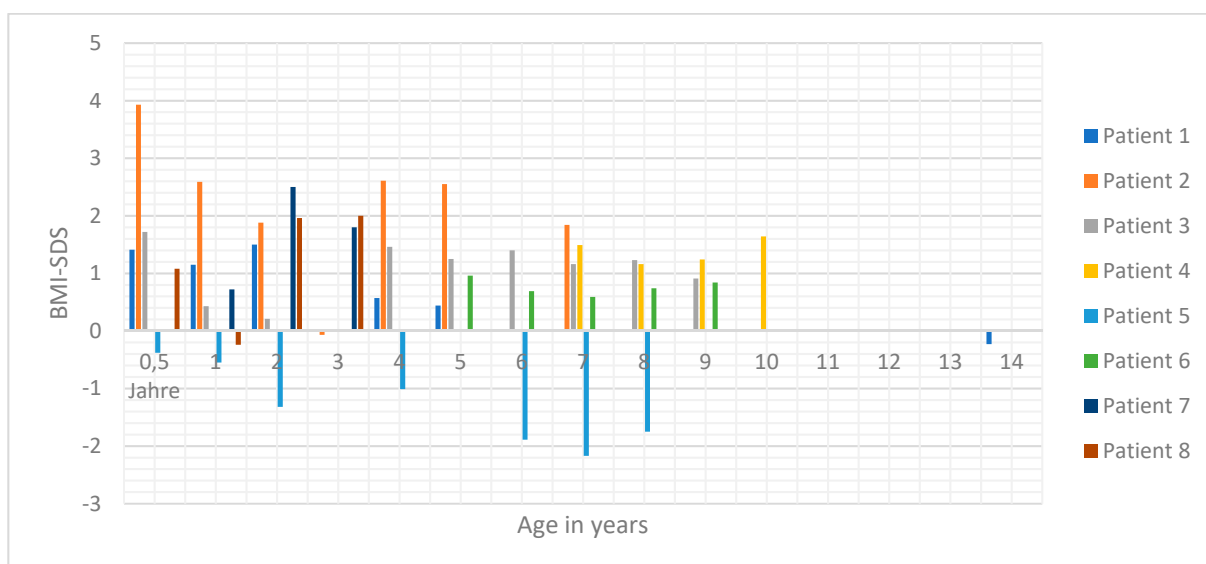

Figure S4. BMI-SDS of female PHTS patients in comparison to German Reference growth charts [11].

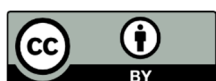

Supplement: s1 [file s1]
